## CORRECTION

# Comparison of the validity of Hill and Huxley muscle–tendon complex models using experimental data obtained from rat m. soleus *in situ*

Koen K. Lemaire, Guus C. Baan, Richard T. Jaspers and A. J. ‘Knoek’ van Soest

There was an error published in J. Exp. Biol. **219**, 977–987.

In the set of ordinary differential equations derived from Eqn 8 and in Eqns 10 and 12, the second minus sign on the right-hand side of the equations should have been a plus sign; in addition, in the derived equations and in Eqn 10,  $g$  was missing. The correct equations are shown below.

$$\begin{aligned} \frac{dt}{d\lambda} &= 1 \\ \frac{dn}{d\lambda} &= f(\mathbf{x}) - [f(\mathbf{x}) + g(\mathbf{x})]\mathbf{n} \\ \frac{dx}{d\lambda} &= u \cdot \mathbf{1} \\ \frac{dn}{dt} &= f(\mathbf{x}) - [f(\mathbf{x}) + g(\mathbf{x})]\mathbf{n} \\ \frac{dx}{dt} &= u \cdot \mathbf{1} \end{aligned} \tag{10}$$

$$\begin{aligned} \frac{dn}{dt} &= q \cdot F_{CE}^{isom} \cdot f(\mathbf{x}) - [f(\mathbf{x}) + g(\mathbf{x})]\mathbf{n} \\ \frac{dx}{dt} &= u \cdot \mathbf{1} \end{aligned} \tag{12}$$

The authors apologise for any confusion this may have caused.
